# Supplementary material
Source: PubMed Central journal article supplement (PMC6397532)
Supplement: pnas.1816247116.sapp.pdf [file pnas.1816247116.sapp.pdf]

## Supplementary Information for

### Structural, Functional, and Behavioral Insights of Dopamine Dysfunction Revealed by a Deletion in SLC6A3

Nicholas G. Campbell, Aparna Shekar, Jenny I. Aguilar, Dungeng Peng, Vikas Navratna, Dongxue Yang, Alexander N. Morley, Amanda M. Duran, Greta Galli, Brian O'Grady, Ramnarayan Ramachandran, James S. Sutcliffe, Harald H. Sitte, Kevin Erreger, Jens Meiler, Thomas Stockner, Leon M. Bellan, Heinrich J.G. Matthies, Eric Gouaux, Hassane S. Mchaourab, Aurelio Galli

Corresponding Author: Aurelio Galli  
Email: [agalli@uab.edu](mailto:agalli@uab.edu)

#### **This PDF file includes:**

Supplementary Information 1  
Supplementary Information 2  
Figs. S1 to S5  
Tables S1 to S2  
Captions for movies S1 to S2

#### **Other supplementary materials for this manuscript include the following:**

Movies S1 to S2

## Supplementary Information I

**Diagnosis:** The autism-affected male in this family of European ancestry was ascertained as part of the Simons Simplex Collection, which recruits families comprising of a proband, unaffected parents and an unaffected sibling. The proband received a consensus diagnosis of “autism” on the Autism Diagnostic Interview-Revised (ADI-R) and the Autism Diagnostic Observation Schedule (ADOS) classifications (Supplemental Figure S1). Cognitive testing indicated the proband had an IQ in the normal range (Full scale IQ: 94).

**Scoring:** Parsing ADI-R domains revealed deficits across all four categories: (1) Reciprocal Social Interaction (score=30; cutoff=10); (2) Abnormalities in Communication (score=22; cutoff=8); (3) Restricted, Repetitive and Stereotyped Patterns of Behavior (score=8; cutoff=3); (4) Development Evident at or Before 36 Months (score=1; cutoff=1).

ADOS testing was performed at 191 months using module 3, which is intended for verbally fluent children. The proband received a raw ADOS score of 27, and a calibrated severity score (CSS), a metric to approximate autism severity (Gotham et al., 2009), of 8. The average autism CSS score is  $7.09 \pm 2.45$  (Gotham et al., 2009).

The Social Responsiveness Scale (SRS) is an instrument used to quantify social impairment across entire range of the autism spectrum and can be completed by parents and/or teachers. The proband received T-scores of 89 and 77 from the parents and teacher respectively, scores indicating “severe” deficits in everyday social interactions. Female sibling assessment using the SRS indicated normal development.

The broad autism phenotype (BAP) describes a set of behavioral and language features/deficits which occur in individuals resulting from a milder expression of the underlying genetic liability for autism. One instrument to measure BAP in adults is the Broad Autism Phenotype Questionnaire (BAPQ). The BAPQ was designed to measure aloof personality, rigid personality, and pragmatic language deficits. In this family, the father received an overall BAPQ score of 3.58 (cutoff=3.15) indicating a broad autism phenotype (Supplemental Figure S1), with BAPQ subscale scores of Aloof=3.33 (cutoff 3.25), Rigid=3.25 (cutoff 3.50), and Pragmatic Language=3.25 (cutoff 2.75). The mother of the proband received an overall score of 2.22 (cutoff=3.15) indicating no broad autism phenotype, with BAPQ subscale scores of Aloof=2.25 (cutoff 3.25), Rigid=2.25 (cutoff 3.50), and Pragmatic Language=2.17 (cutoff 2.75).

## Supplementary Information 2

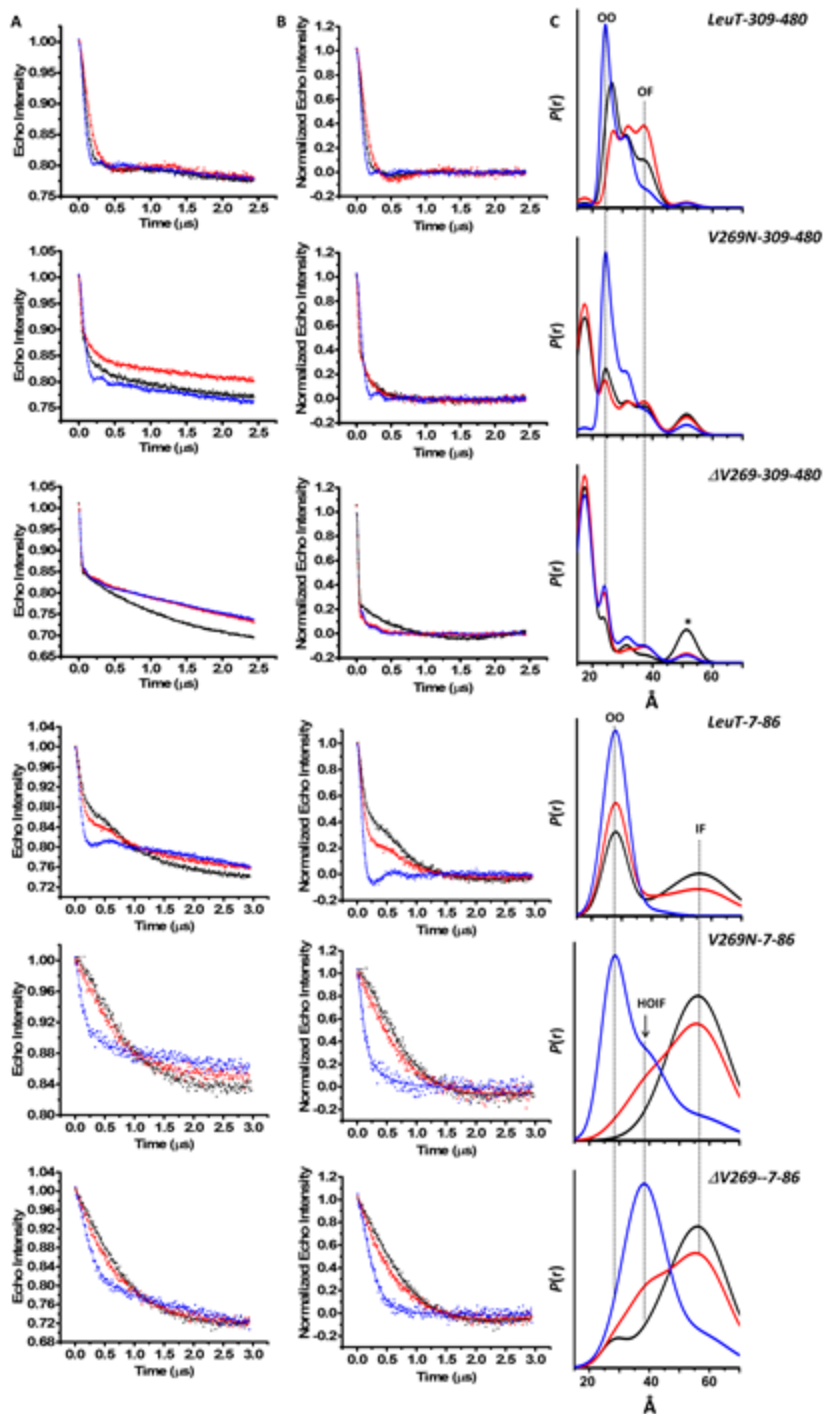

**SI 2. DEER analysis of the mutants.** (A) Primary DEER signal and associated fits, (B) normalized and background-corrected signals and (C) distance distribution  $P(r)$ .

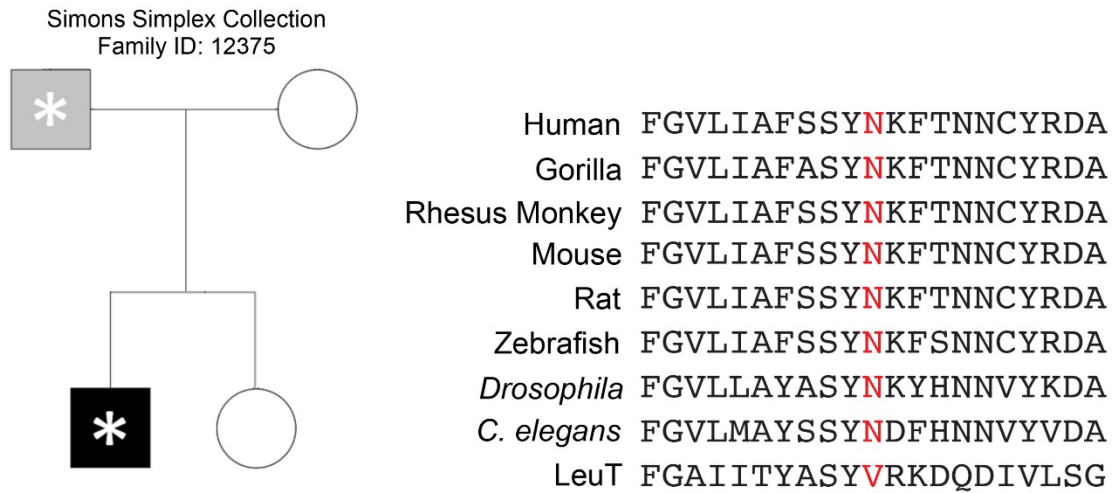

Supplemental Figure S1

**Fig. S1.** Identification of an in-frame deletion of N336 in hDAT in an ASD family. Left: An inherited in-frame deletion was identified in an ASD family within the Simons Simplex Collection. Black filled boxes indicate affected individuals (diagnosed with ASD), and grey filled boxes indicate individuals testing broad autism phenotype on the BAPQ. Asterisks indicate individuals heterozygous for the variant. Right: High residue conservation across species at and surrounding the residue N336 (in red), predicts a functional effect of the variant.

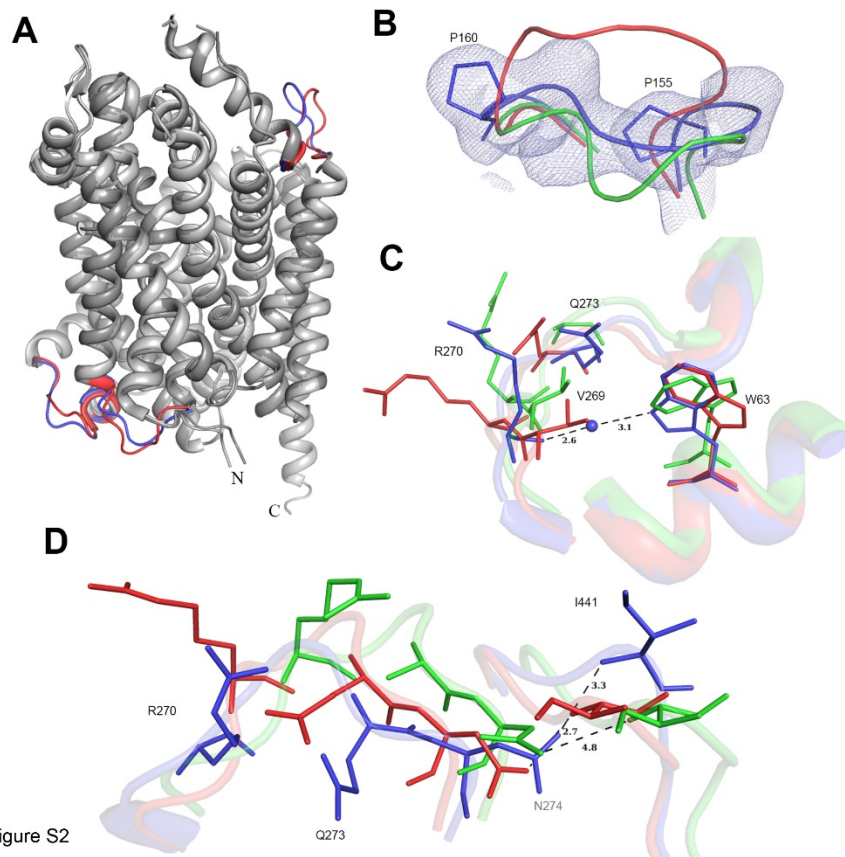

Supplemental Figure S2

**Fig. S2. Related to Figure 2.** Structure of LeuT  $\Delta$ V269. A: Differences in the regions other than the N-termini are highlighted in red (2A65) and blue ( $\Delta$ V269). B: Movement of loop 153-162. The residues in  $\Delta$ V269 are highlighted by a 2Fo-Fc density map. The same regions in 2A65 and 3TT3 (green) are displayed in cartoon representation in the background. C: Side chain flip of W63. The water molecule coordinating the indole ring is displayed as a blue sphere. D: Movement of loop 438-444. Residue I441 and N274 are highlighted.

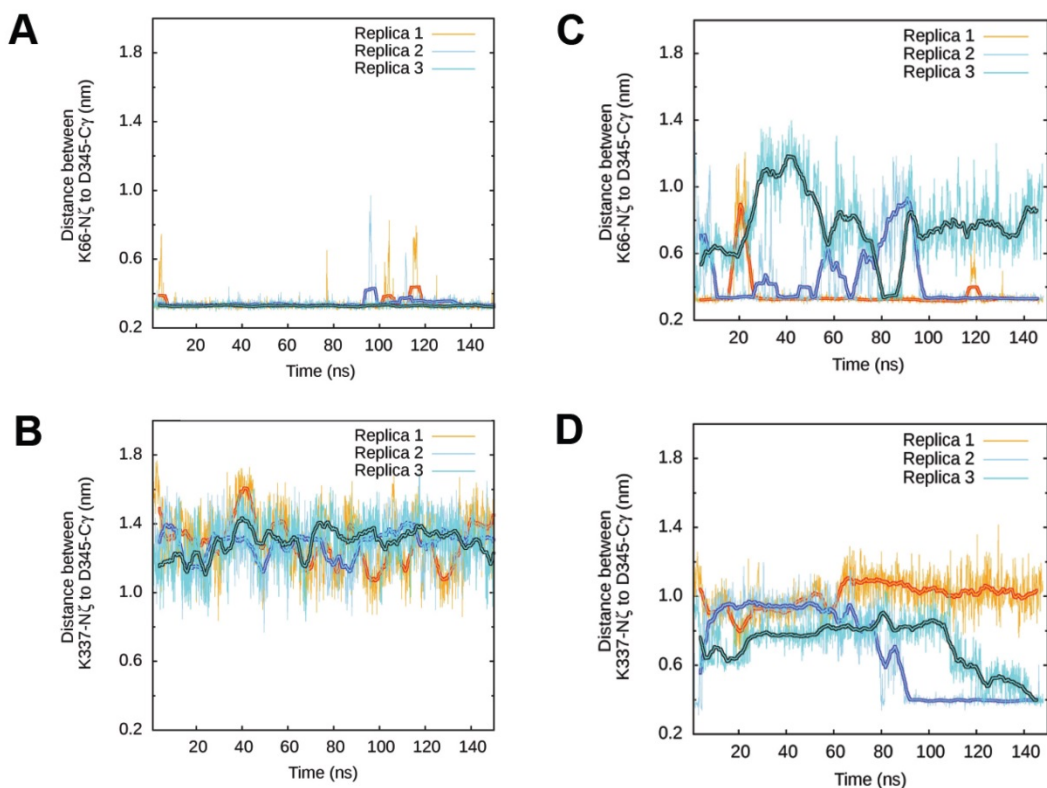

Supplemental Figure S3

**Fig. S3. Related to Figure 3.** In hDAT, the  $\Delta$ N336 promotes repositioning of K337 that weakens the K66-D345 interaction by competing for D345. A: Time evolution of distances in hDAT. Distances are measured between K66 atom N $\zeta$ , and D345 atom C $\gamma$ . B: Time evolution of distances in hDAT. Distances are measured between K337 atom N $\zeta$ , and D345, atom C $\gamma$ . C: Time evolution of distances in hDAT  $\Delta$ N336. Distances are measured between K66 atom N $\zeta$ , and D345 atom C $\gamma$ . D: Time evolution of distances in hDAT  $\Delta$ N336. Distances are measured between K337 atom N $\zeta$ , and D345, atom C $\gamma$ . All simulations were conducted in triplicate from independent starting structures.

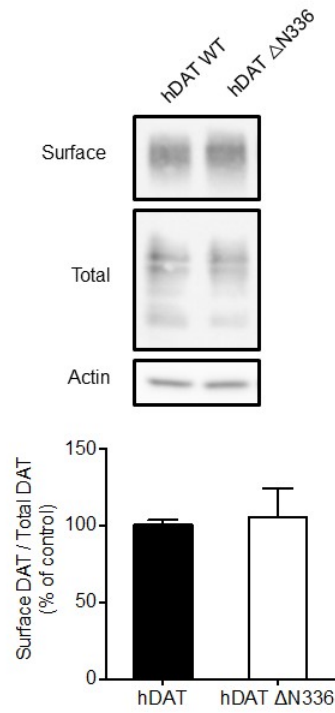

**Figure S4**

**Fig. S4. Related to Figure 4.** hDAT  $\Delta$ N336 displays equivalent expression of total and surface protein. Representative immunoblots for biotinylated (surface) and total protein fractions from hDAT and hDAT  $\Delta$ N336 cells. Surface fractions were quantitated, normalized to total DAT, and expressed as a percent of control ( $p \geq 0.05$  by Student's t-test;  $n = 4$ ). Actin serves as a loading control.

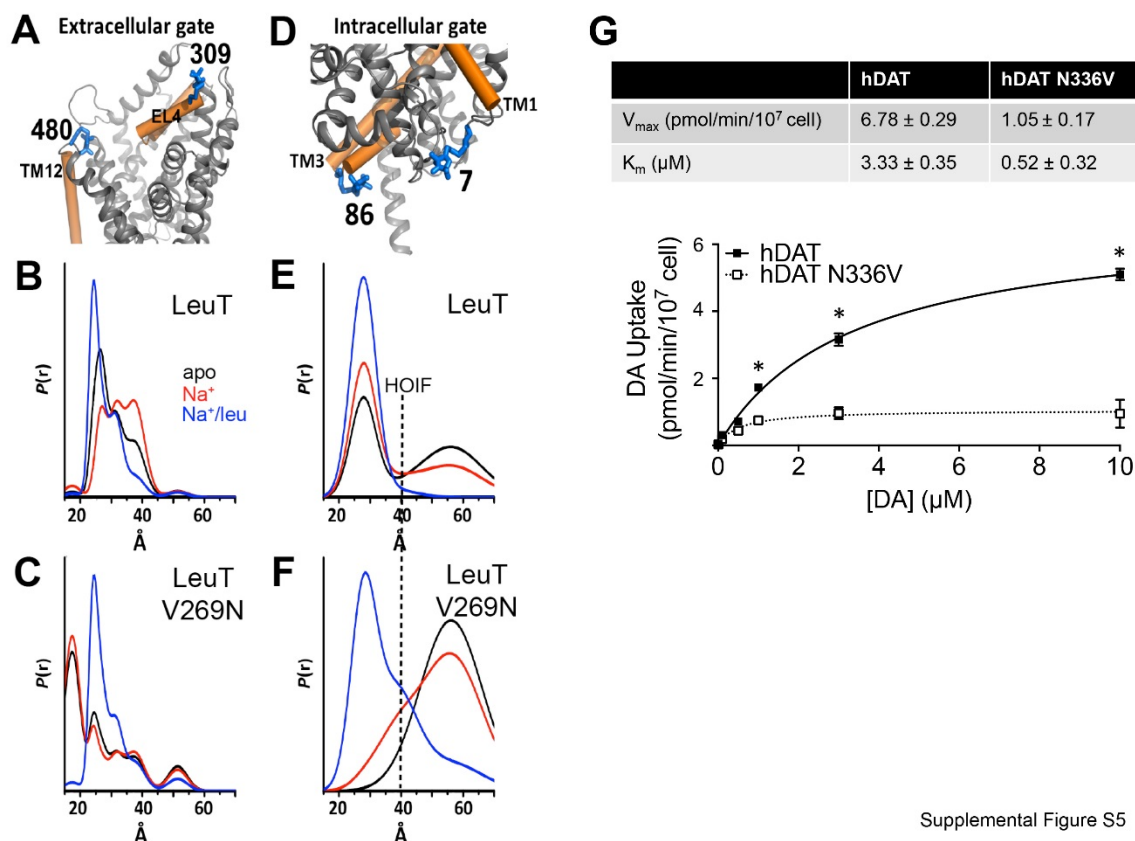

Supplemental Figure S5

**Fig. S5.** V269N increases the intracellular gate dynamics in LeuT. **A:** Extracellular reporter pairs (309-480) tagged on a three-dimensional structure of LeuT. **D:** Intracellular reporter pairs (7-86) tagged on a three-dimensional structure of LeuT. **B,E:** Distance of the extracellular and intracellular reporter pair respectively for LeuT, in the apo conformation (black), in the presence of Na<sup>+</sup> (red), or in the presence of Na<sup>+</sup> plus Leu (blue). **C,F:** Distance of the extracellular and intracellular reporter pair for LeuT V269N, in the apo conformation (black), in the presence of Na<sup>+</sup> (red), or in the presence of Na<sup>+</sup> and Leu (blue). **G:** Top: Kinetic parameters ( $V_{max}$  and  $K_m$ ) for hDAT and hDAT N336V ( $n = 3$ , in triplicate). Bottom: Representative plot of [<sup>3</sup>H]DA uptake kinetics in hDAT (filled squares) or hDAT V336N (empty squares) cells (\* =  $p < 0.05$  by two-way ANOVA followed by Bonferroni post test;  $n = 3$ , in triplicate).



**Table S1. Related to Figure 2.** Table representing the log likelihood gain score observed in phaser using various search models, which served as an indication of conformation of LeuT  $\Delta$ V269 structure.

| <b>PDB ID</b> | <b>Conformation</b>                                   | <b>LLG score from MR</b> |
|---------------|-------------------------------------------------------|--------------------------|
| 3TT3          | Inward open                                           | 199                      |
| 3TT1          | Outward open                                          | 2000                     |
| 5JAE          | Outward-oriented, Na <sup>+</sup> free return state   | 2500                     |
| 3USG          | Outward-occluded, bound to L-leucine                  | 6110                     |
| 2Q72          | Outward-occluded, L-leucine and Na <sup>+</sup> bound | 5700                     |

**Table S2. Related to Figure 2.** Data collection, model building, and refinement statistics.

| <b>LeuT <math>\Delta</math>V269</b> |                                     |
|-------------------------------------|-------------------------------------|
| Wavelength (Å)                      | 1.000                               |
| Resolution range (Å)                | 64.05 - 2.62 (2.68 - 2.62)          |
| Space group                         | C 2                                 |
| Unit cell                           | 149.54 86.14 81.53 90 110.721<br>90 |
| Total reflections                   | 85948 (5195)                        |
| Unique reflections                  | 28540 (2042)                        |
| Multiplicity                        | 3.5 (3.6)                           |
| Completeness (%)                    | 96.9 (95.1)                         |
| Mean I/sigma(I)                     | 8.8 (1.9)                           |
| Wilson B-factor (Å <sup>2</sup> )   | 48.6                                |
| R-merge (%)                         | 10.5 (41.3)                         |
| R-meas (%)                          | 12.6 (51.1)                         |
| CC1/2 (%)                           | 99.5 (60.1)                         |
| CC* (%)                             | 99.8 (88.4)                         |
| Reflections used in refinement      | 28521 (2766)                        |
| Reflections used for R-free         | 1426 (138)                          |
| R-work (%)                          | 21.56 (29.60)                       |
| R-free (%)                          | 25.02 (34.61)                       |
| CC (work)                           | 91.7 (74.5)                         |
| CC (free)                           | 81.0 (76.6)                         |
| Number of non-hydrogen atoms        | 4000                                |
| macromolecules                      | 3838                                |
| ligands                             | 85                                  |
| solvent                             | 77                                  |
| Protein residues                    | 492                                 |
| RMS (bonds) (Å)                     | 0.003                               |
| RMS (angles) (°)                    | 0.61                                |
| Ramachandran favored (%)            | 97.73                               |
| Ramachandran allowed (%)            | 2.27                                |
| Ramachandran outliers (%)           | 0                                   |
| Rotamer outliers (%)                | 0.53                                |
| Clashscore                          | 8.22                                |
| Average B-factor (Å <sup>2</sup> )  | 57.29                               |
| macromolecules                      | 56.78                               |
| ligands                             | 80.59                               |
| solvent                             | 56.86                               |

**Movie S1.** Movie of a hDAT WT fly showing the short freezing period, followed by a distinctive and rapid increase in average velocity (fleeing) upon a predatory sound (red highlighting shade). The video frame/rate was reduced 4X.

**Movie S2.** Movie of a hDAT  $\Delta$ N336 fly showing a prolonged freezing period, followed by a reduced increase in average velocity (fleeing) upon a predatory sound (red highlighting shade). The video frame/rate was reduced 4X.
